# Supplementary material
Source: PubMed Central journal article supplement (PMC4110058)
Supplement: NIHMS600626-supplement-1.pdf [file NIHMS600626-supplement-1.pdf]

PROPOSED SUPPLEMENTARY ONLINE TABLES (2)

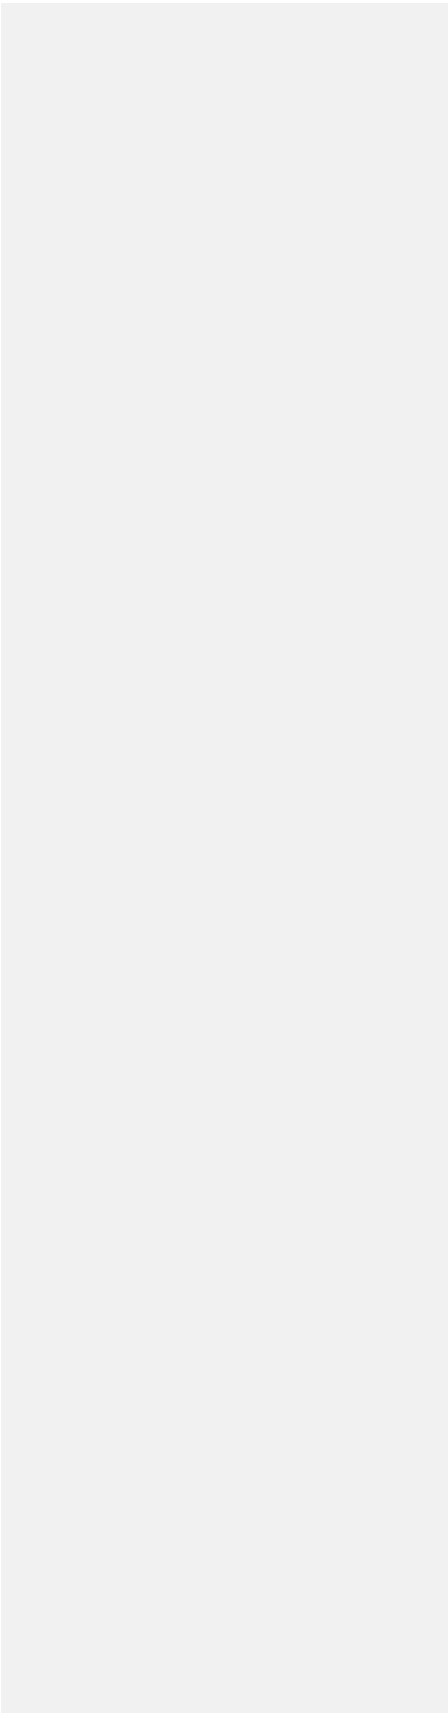

## Supplementary Table 1

*Confirmatory factor analysis goodness-of-fit indices for the MEIM-R by modality in the GEM trial analytic sample*

| Model                                           | $\chi^2_{SB} (df)$ | SRMR | RMSEA<br>[90% CI] | CFI | AIC      | CFI<br>difference | AIC<br>difference | $\Delta\chi^2_{SB} (df)$ |
|-------------------------------------------------|--------------------|------|-------------------|-----|----------|-------------------|-------------------|--------------------------|
| <i>Measurement invariance across modalities</i> |                    |      |                   |     |          |                   |                   |                          |
| 1. Fit of correlated two-factor model           |                    |      |                   |     |          |                   |                   |                          |
| 1a. Mail ( $n = 741$ )                          | 32.61 (8)***       | .03  | .06 [.04-.09]     | .98 | 10311.33 |                   |                   |                          |
| 1b. Online ( $n = 722$ )                        | 43.06 (8)***       | .02  | .08 [.06-.10]     | .98 | 10073.74 |                   |                   |                          |
| 2. Equal factor structure                       | 75.81 (16)***      | .03  | .07 [.06-.09]     | .98 | 20385.08 |                   |                   |                          |
| 3. Equal factor loadings                        | 80.28 (20)***      | .03  | .06 [.05-.08]     | .98 | 20378.95 | .000              | -6.13             | 1.59 (4)                 |
| 4. Equal item intercepts                        | 88.05 (16)***      | .03  | .06 [.05-.07]     | .98 | 20375.81 | .001              | -3.14             | 4.90 (4)                 |

*Note.*  $\chi^2_{SB}$  = Satorra–Bentler scaled chi-square; SRMR = standardized root mean square residual; RMSEA = root mean square error of approximation; CI = confidence interval; CFI = Bentler comparative fit index; AIC = Akaike Information Criterion.

\*\*\* $p < .001$ .

## Supplementary Table 2

*Confirmatory factor analysis parameter estimates, means, standard deviations, and Cronbach's alphas for the MEIM-R by modality in the GEM trial analytic sample*

|        |     | CFA completely standardized parameter estimates <sup>a</sup> |     |     |     |            |     |     |                      |          |                     |          |               |          |  |
|--------|-----|--------------------------------------------------------------|-----|-----|-----|------------|-----|-----|----------------------|----------|---------------------|----------|---------------|----------|--|
| Group  | n   | Exploration                                                  |     |     |     | Commitment |     |     | Exploration subscale |          | Commitment subscale |          | Overall scale |          |  |
|        |     | A                                                            | E1  | E4  | E5  | C2         | C3  | C6  | M (SD)               | $\alpha$ | M (SD)              | $\alpha$ | M (SD)        | $\alpha$ |  |
| Mail   | 741 | .72                                                          | .56 | .91 | .79 | .84        | .81 | .88 | 3.17 (0.90)          | .79      | 3.76 (0.85)         | .88      | 3.47 (0.77)   | .86      |  |
| Online | 722 | .78                                                          | .64 | .94 | .83 | .89        | .85 | .89 | 3.09 (1.00)          | .86      | 3.60 (0.96)         | .91      | 3.34 (0.89)   | .90      |  |

*Note.* Means and standard deviations represent observed scores.

<sup>a</sup>Labels correspond to paths in Figure 1.
